# Supplementary material for: Ternary Polyaniline@Bi2O3-BiOCl Nanocomposites as Innovative Highly Active Photocatalysts for the Removal of the Dye under Solar Light Irradiation
Source: MDPI journal article supplement (doi:10.3390/nano13040713), 2023-02-13
Supplement: s1 [file s1]

# **Ternary Polyaniline@Bi<sub>2</sub>O<sub>3</sub>-BiOCl Nanocomposites as Innovative Highly Active Photocatalysts for the Removal of the Dye under Solar Light Irradiation**

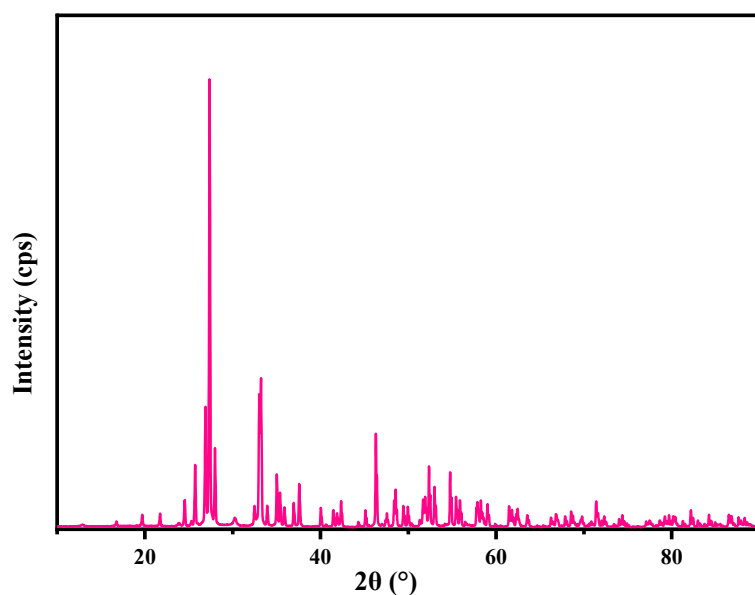

**Figure S1.** XRD patterns of Bi<sub>2</sub>O<sub>3</sub>

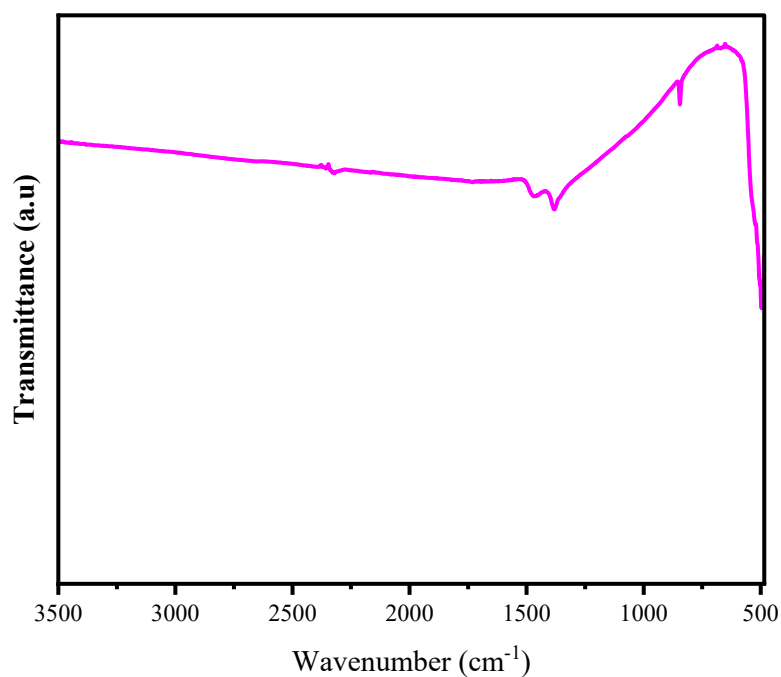

**Figure S2.** FTIR spectrum of Bi<sub>2</sub>O<sub>3</sub>

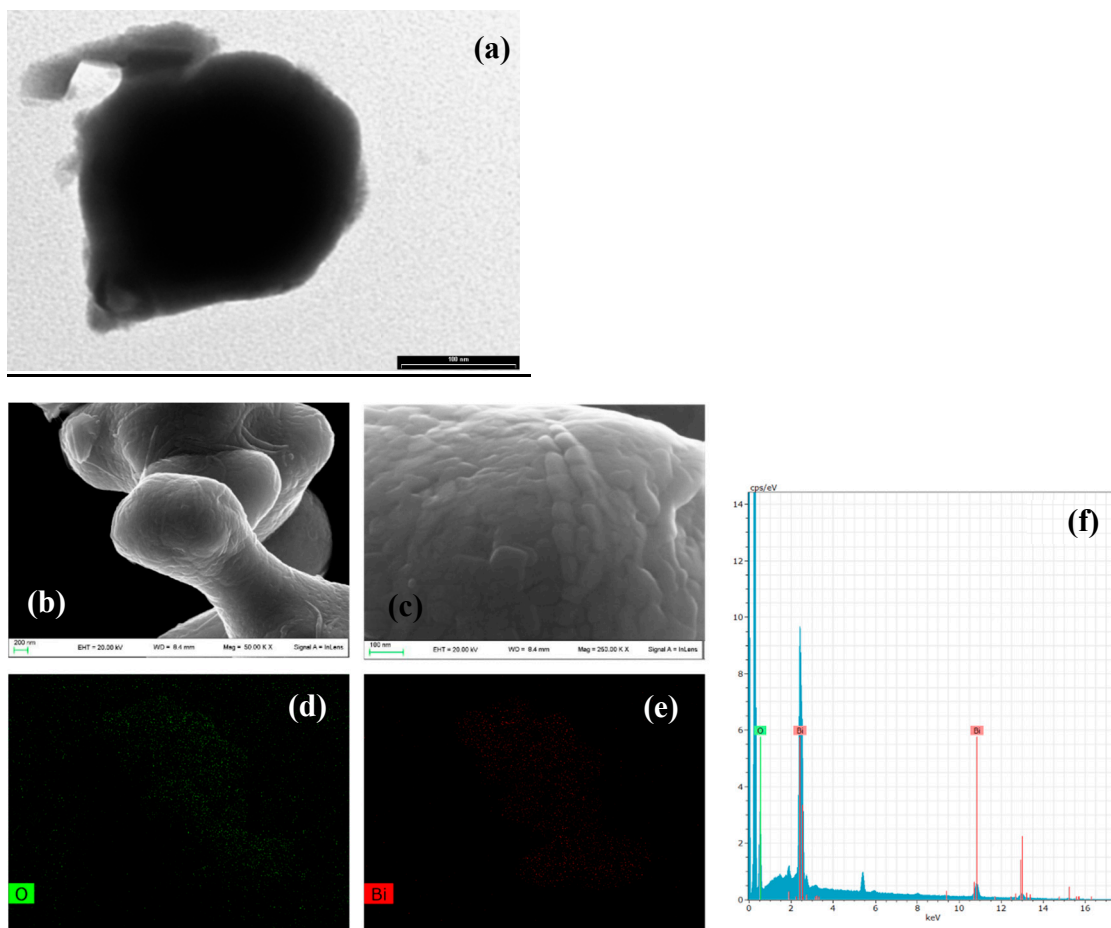

**Figure S3.** (a) TEM image, (b and c) SEM images, (d and e) O and Bi elemental mapping and (f) EDS spectrum of  $\text{Bi}_2\text{O}_3$

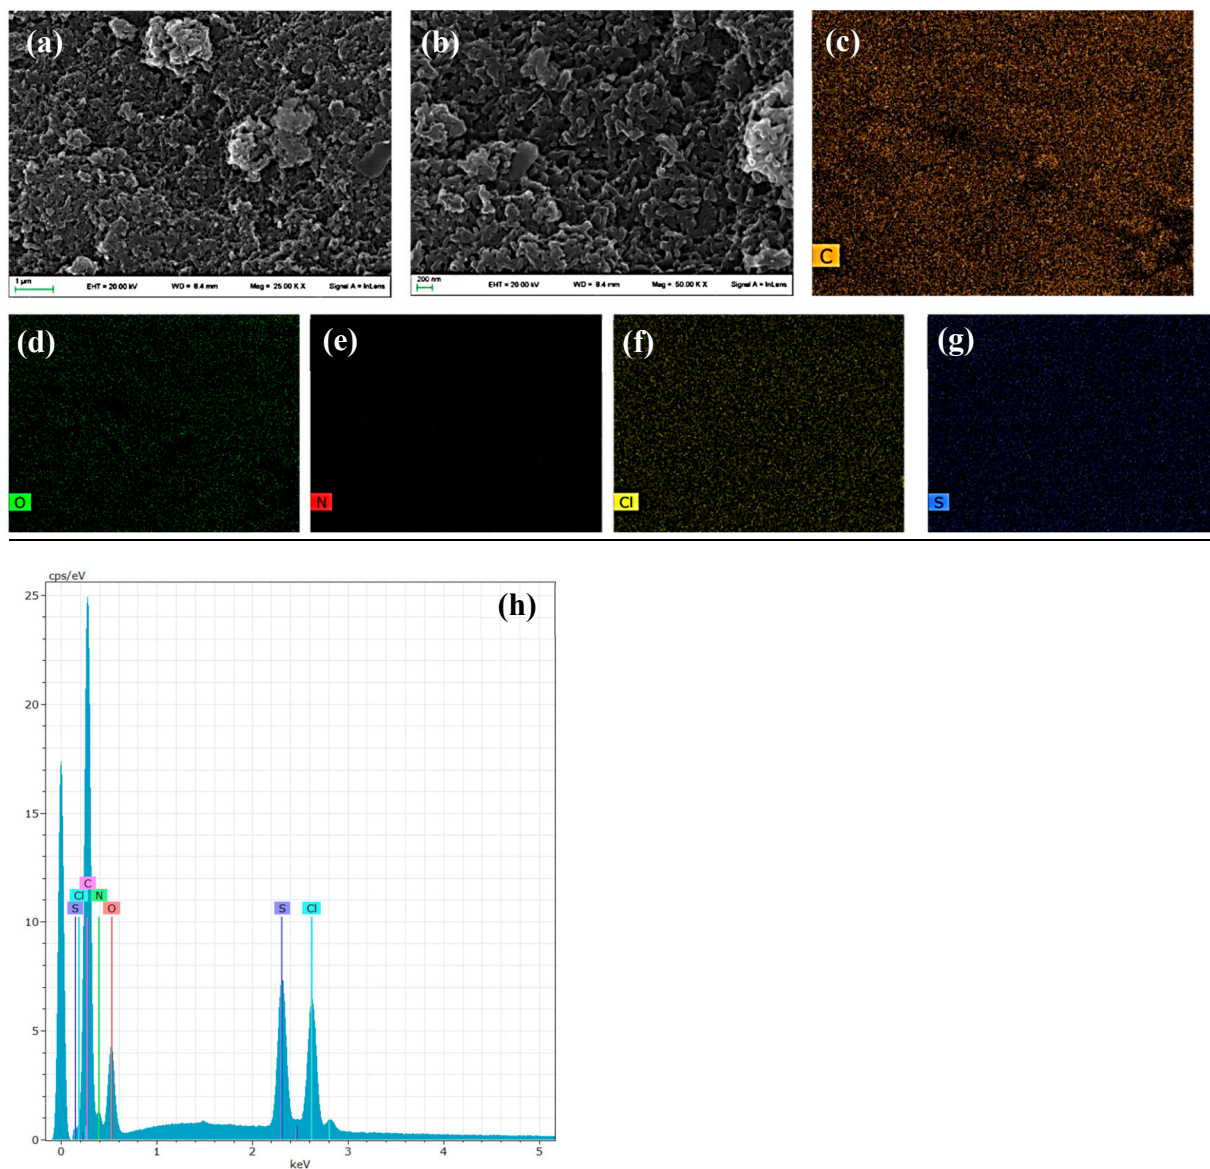

**Figure S4.** (a and b) SEM Image, (c-g) elemental mapping and EDS spectrum PANI

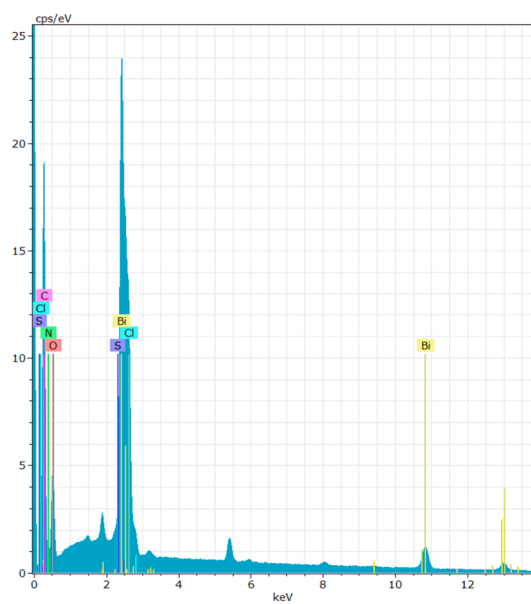

**Figure S5.** EDS spectrum of 0.5PBB

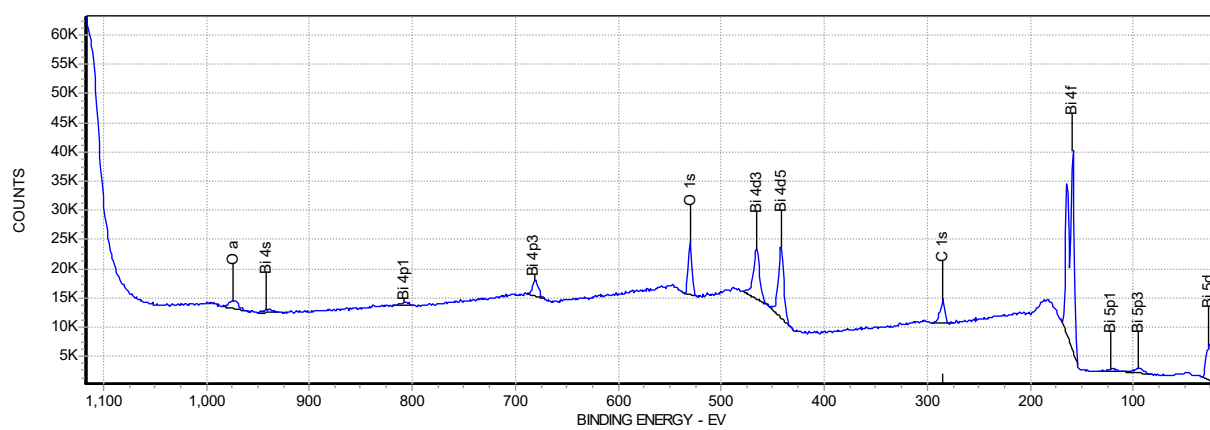

**Figure S6.** XPS survey spectra of  $\text{Bi}_2\text{O}_3$

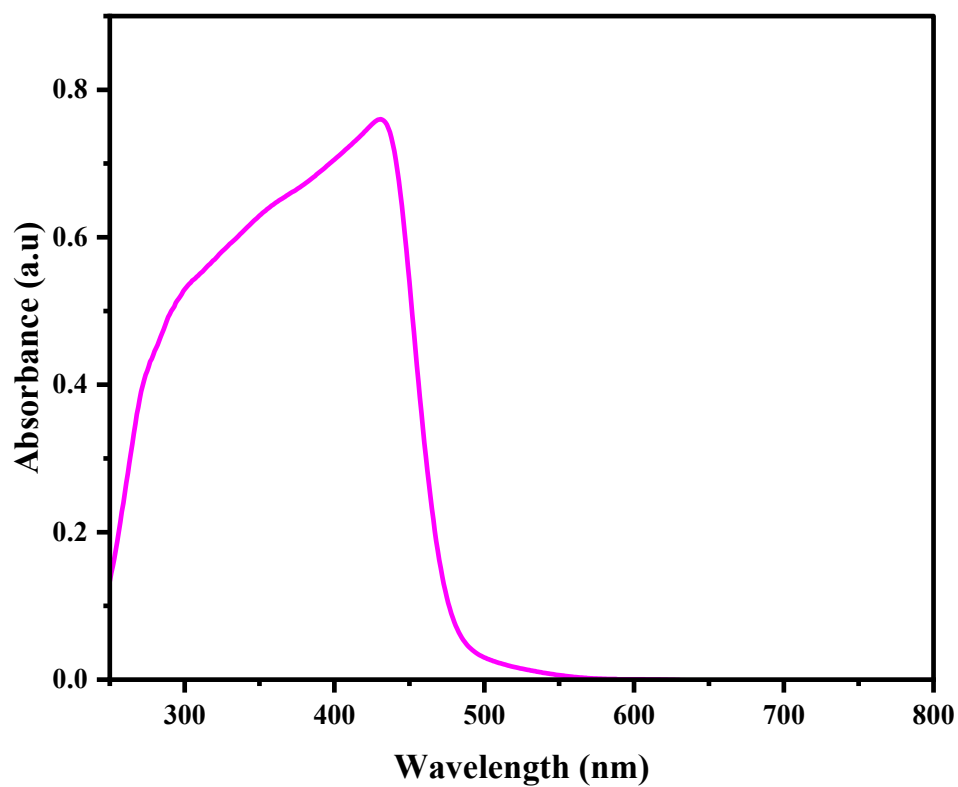

**Figure S7.** UV-visible spectra of  $\text{Bi}_2\text{O}_3$

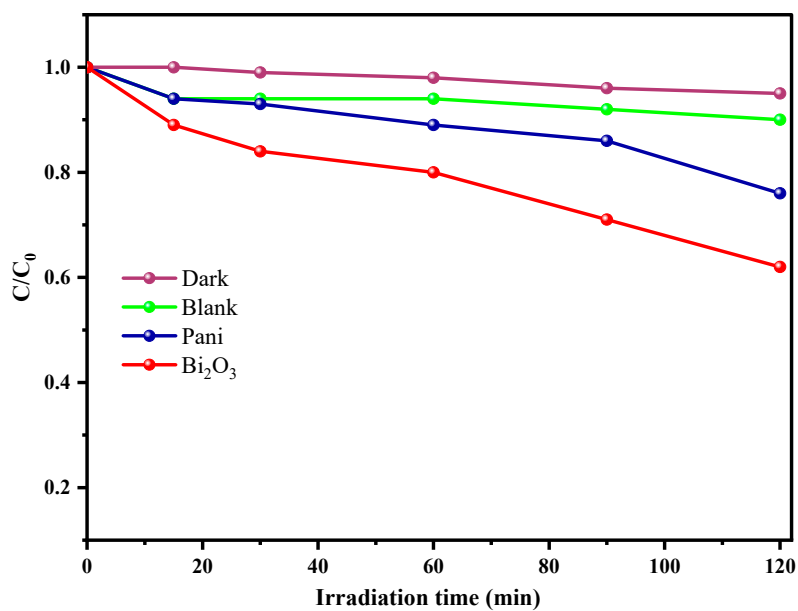

**Figure S8.** Conversion plots for the photodegradation of MB by PANI,  $\text{Bi}_2\text{O}_3$ , blank and in Dark

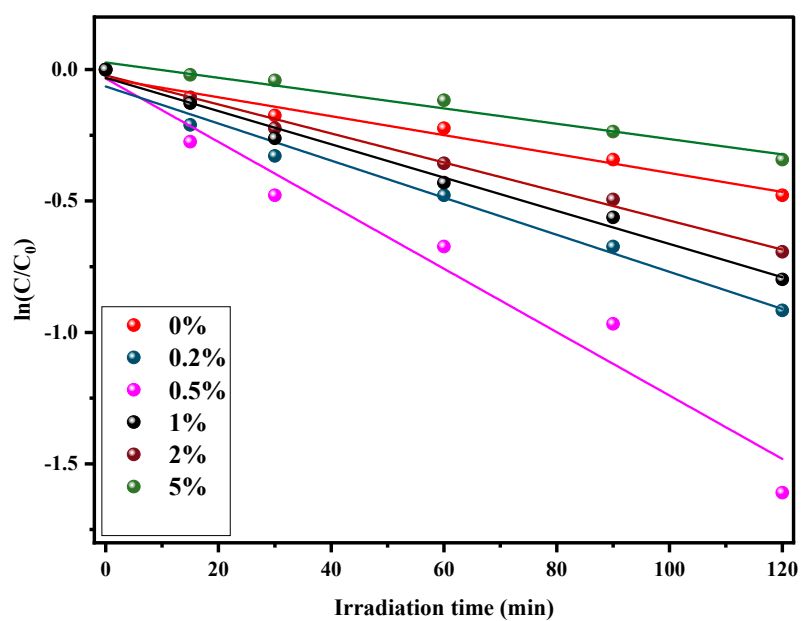

**Figure S9.** Kinetic curves ( $\ln(C/C_0)=f(t)$ ) of MB photodegradation
